# Supplementary material
Source: PubMed Central journal article supplement (PMC3784545)
Supplement: JCI69884sd.pdf [file JCI69884sd.pdf]

# Supplemental Figures

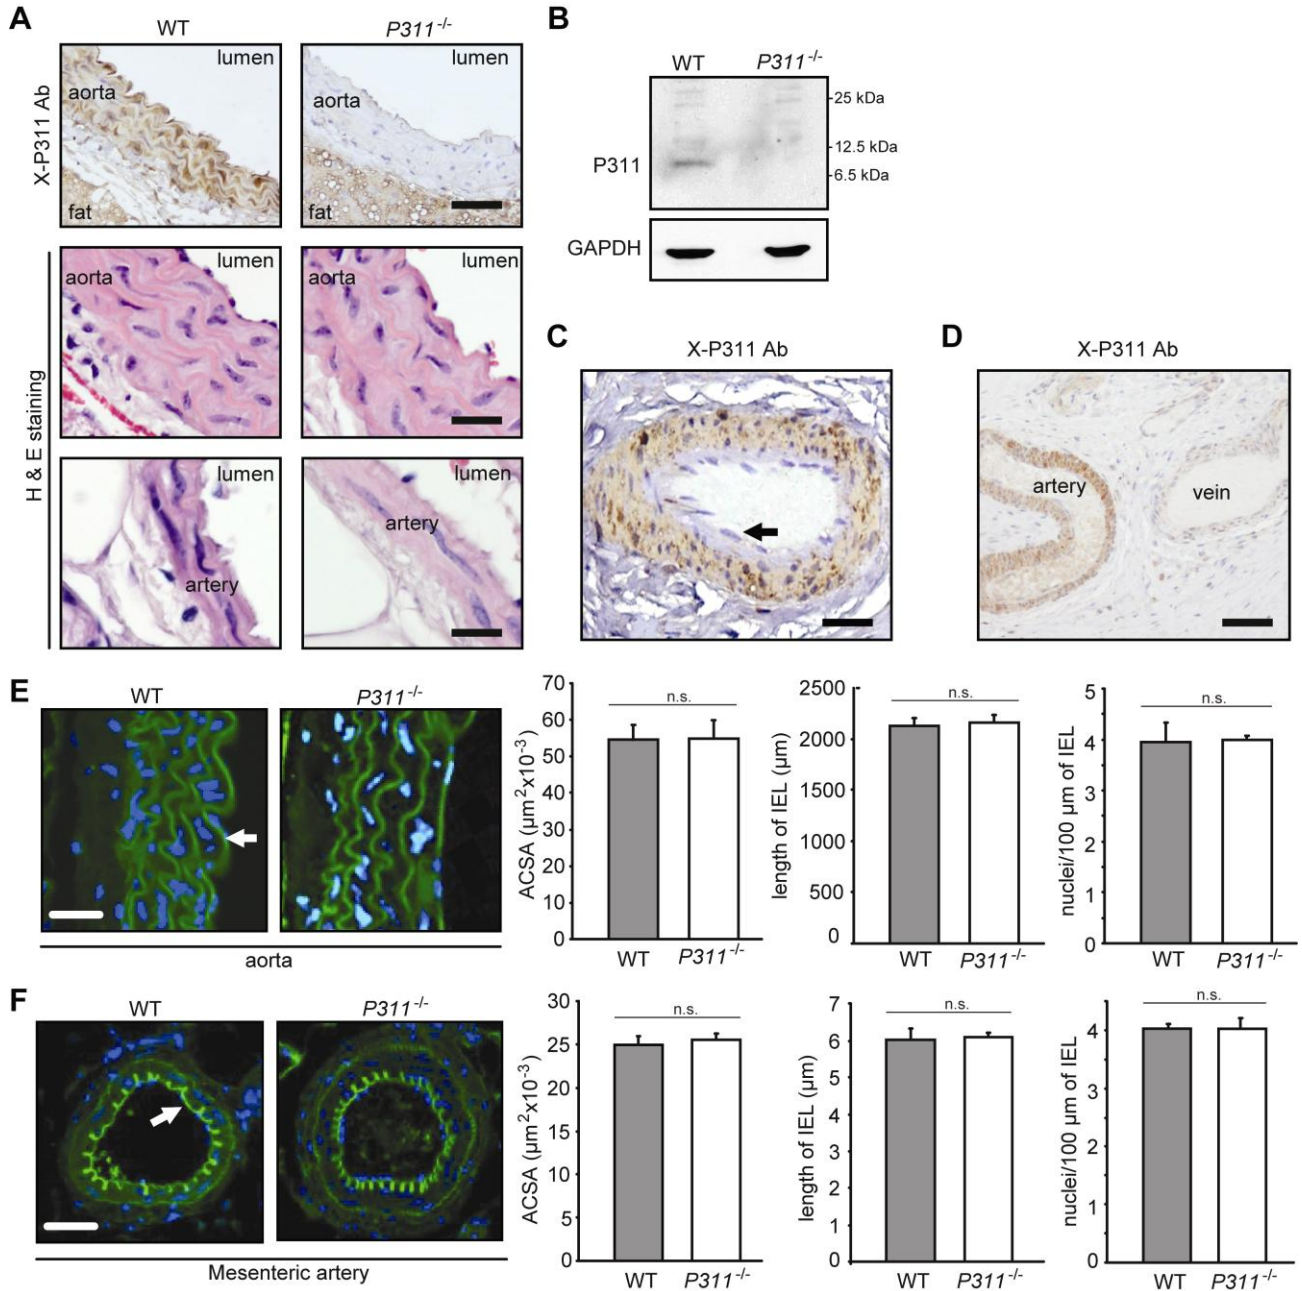

**Supplemental Figure 1** Presence of P311 in mouse and human vascular muscle. **(A)** P311 immunoreactivity (brown staining) in WT and *P311*<sup>-/-</sup> mice aortas in upper two panels. Hematoxylin and eosin staining (H&E) showing nuclei (blue staining) and eosinophilic structure (pink staining) in bottom four panels. Scale bars, 50  $\mu\text{m}$  in upper two panels and 10  $\mu\text{m}$  in the rest. **(B)** Western blot analysis of P311 in WT and *P311*<sup>-/-</sup> mice aortas. **(C)** P311 immunoreactivity (brown staining) in human artery. Arrow indicates endothelium. Scale bar, 40  $\mu\text{m}$ . **(D)** P311 immunoreactivity (brown staining) in human artery and vein. Scale bar, 100  $\mu\text{m}$ . **(E and F)** Morphometry images, anatomic cross-sectional area (ACSA), length of internal elastic lamina (IEL) and number of nuclei comprised between two elastic laminas in the aortas **(E)** and mesenteric arteries **(F)** from WT and *P311*<sup>-/-</sup> mice. Arrows indicate elastic lamina. Scale bars, 25  $\mu\text{m}$  for aorta and 50  $\mu\text{m}$  for mesenteric artery. Data represent mean  $\pm$  s.d. n.s., non-significant by one-way ANOVA.

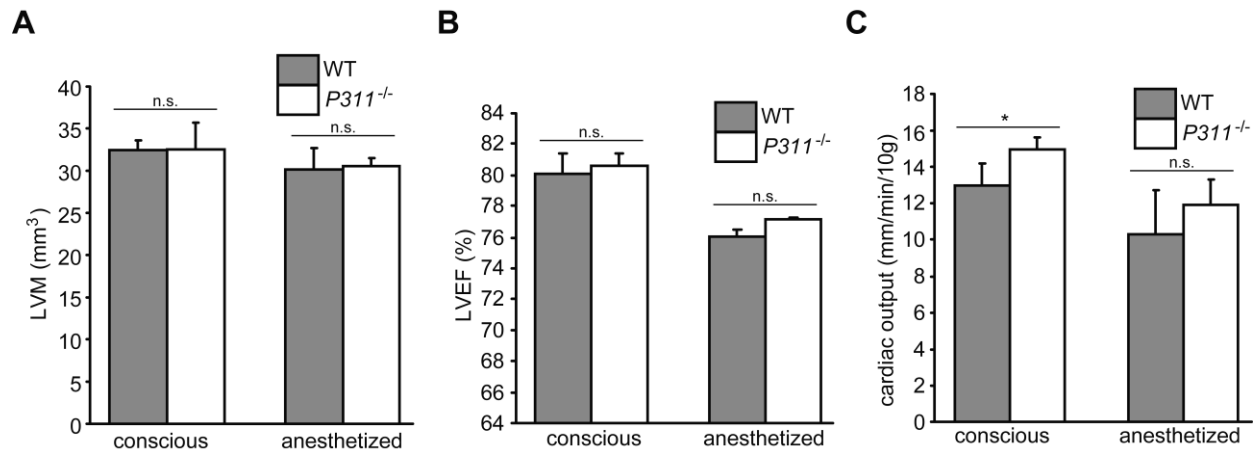

**Supplemental Figure 2** *P311*<sup>-/-</sup> mice have normal heart function. Transthoracic echocardiography parameters of WT and *P311*<sup>-/-</sup> mice. **(A)** Left ventricular mass (LVM). **(B)** Left ventricular ejection fraction (LVEF). **(C)** Cardiac output. Data represent mean  $\pm$  s.d. \* $p < 0.05$ , n.s., non-significant by one-way ANOVA.

**A**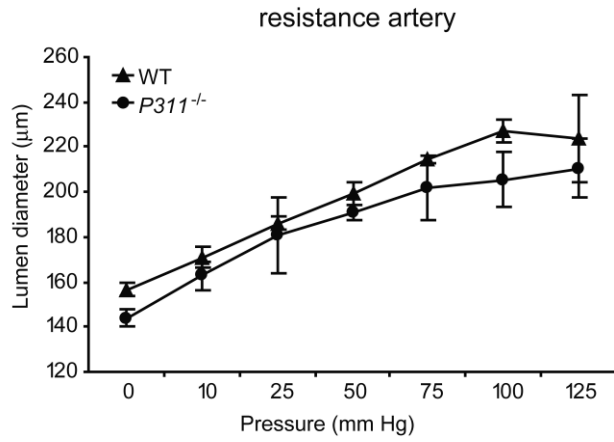**B**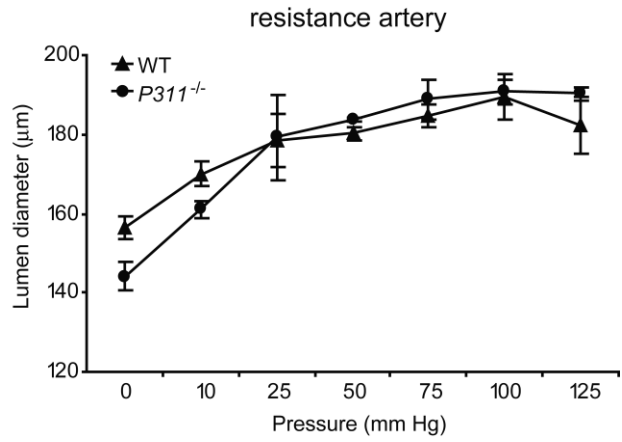

**Supplemental Figure 3** Artery lumen diameters of WT and *P311*<sup>-/-</sup> mice determined by pressure myograph. **(A)** Passive artery lumen diameter curve determined in Ca<sup>2+</sup>-free PSS buffer. **(B)** Active artery lumen diameter curve determined in PSS buffer (containing 2.5 mM CaCl<sub>2</sub>).

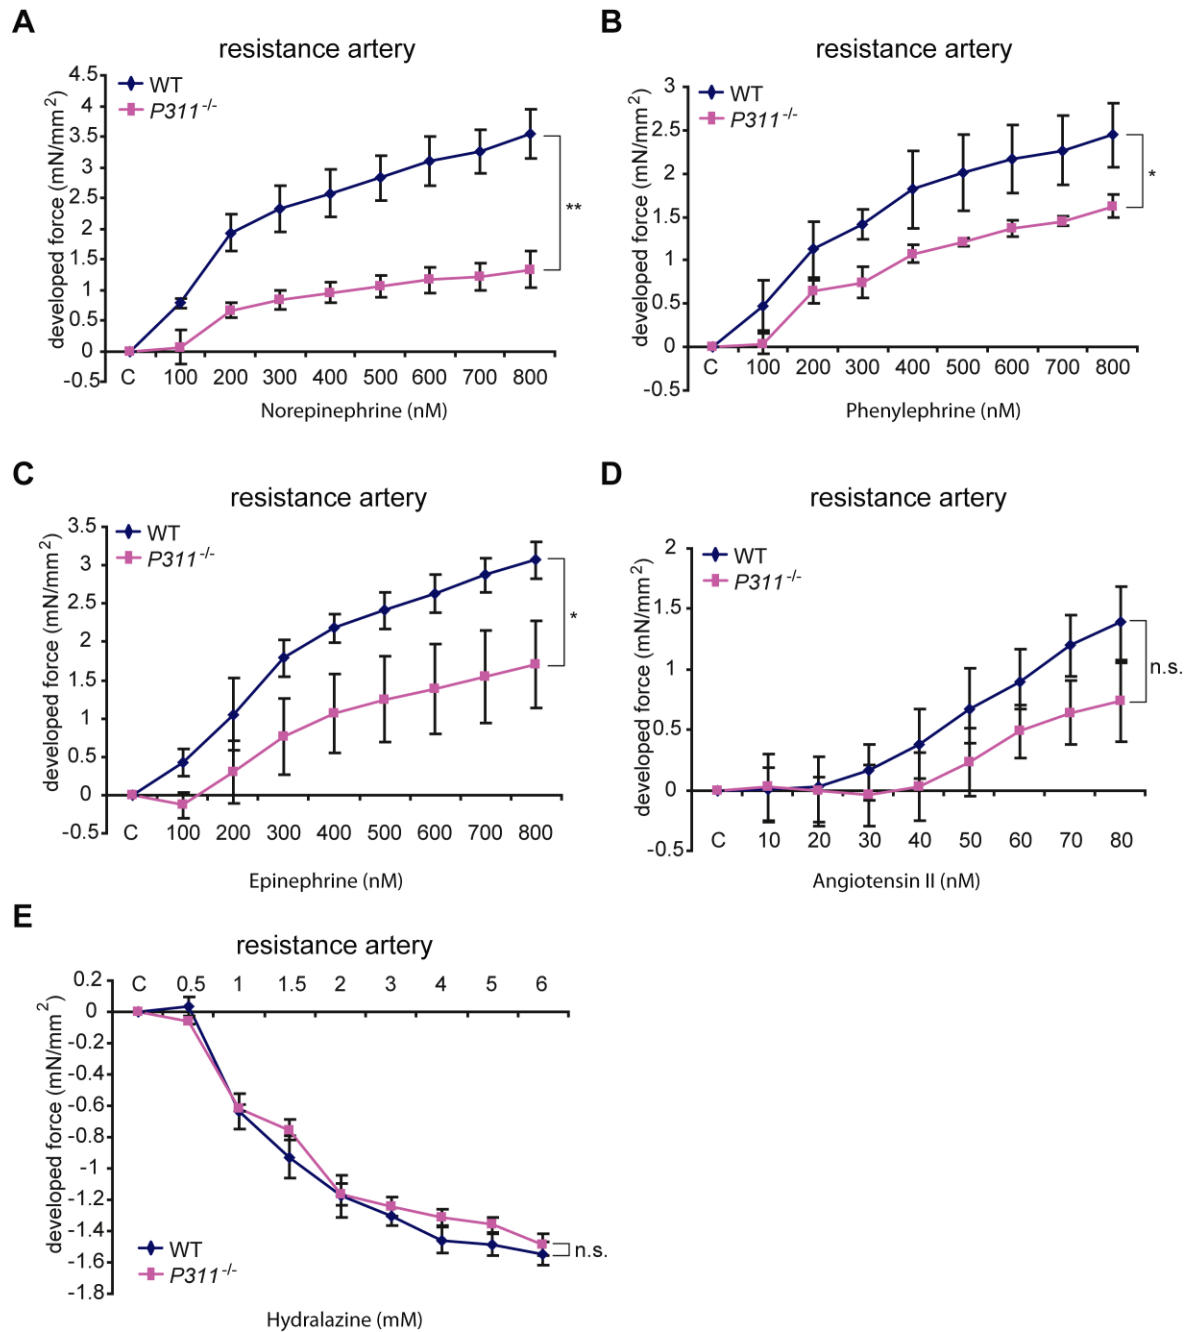

**Supplemental Figure 4** Myographic determination of the contractile and dilatational response of isolated resistance arteries (~100  $\mu\text{m}$  in diameter) from WT ( $n = 3$ ) and P311<sup>-/-</sup> ( $n = 3$ ) mice to vasoconstrictors and vasodilator. (A) Norepinephrine. (B) Phenylephrine. (C) Epinephrine. (D) Angiotensin II. (E) Hydralazine. Data at final time points were statistically analyzed by one-way ANOVA. Data represent mean  $\pm$  s.d. \* $p < 0.05$ , \*\* $p < 0.01$ , n.s., non-significant.

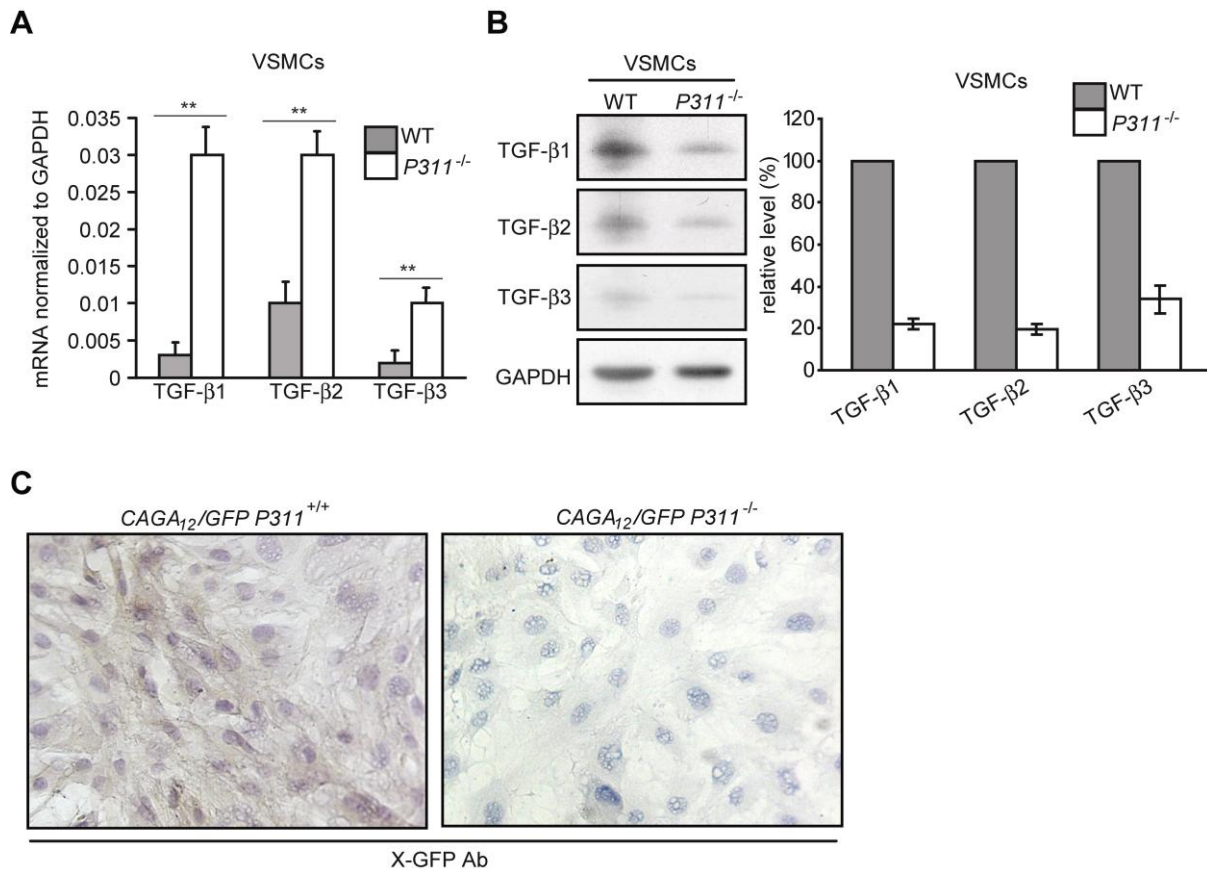

**Supplemental Figure 5** VSMCs isolated from  $P311^{-/-}$  mice have a decrease in the level and activity of TGF- $\beta$ 1, 2 and 3 and their preforms but not in the corresponding mRNAs. **(A)** Real-time PCR showing mRNA levels of TGF- $\beta$ s in WT and  $P311^{-/-}$  mice aortic VSMCs. Data represent mean  $\pm$  s.d.  $**p < 0.01$  by one-way ANOVA. **(B)** Western blots showing TGF- $\beta$ s in VSMCs from WT and  $P311^{-/-}$  mice. The relative level of TGF- $\beta$ s in  $P311^{-/-}$  VSMCs is shown in the histogram on the right as compared with WT VSMCs. **(C)** GFP immunoreactivity (brown staining) in *CAGA*<sub>12</sub>/GFP transgenic  $P311^{+/+}$  and  $P311^{-/-}$  mice VSMCs.

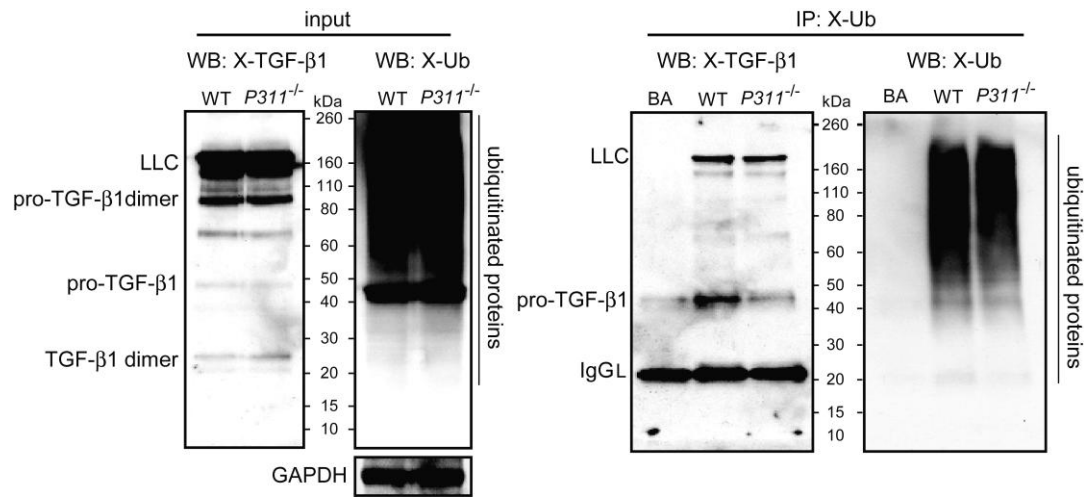

**Supplemental Figure 6** *P311* shows no effect on TGF-β1 ubiquitination. Ubiquitin (Ub) immunoprecipitation (IP) assays and western blots (WB) showing the ubiquitinated TGF-β1 in aortas. Input was normalized according to TGF-β1 level in WT and *P311*<sup>-/-</sup> mice aortas. Equal amount of total ubiquitinated protein was immunoprecipitated from normalized input for TGF-β1 detection. LLC, large latent TGF-β complex. BA, beads alone.

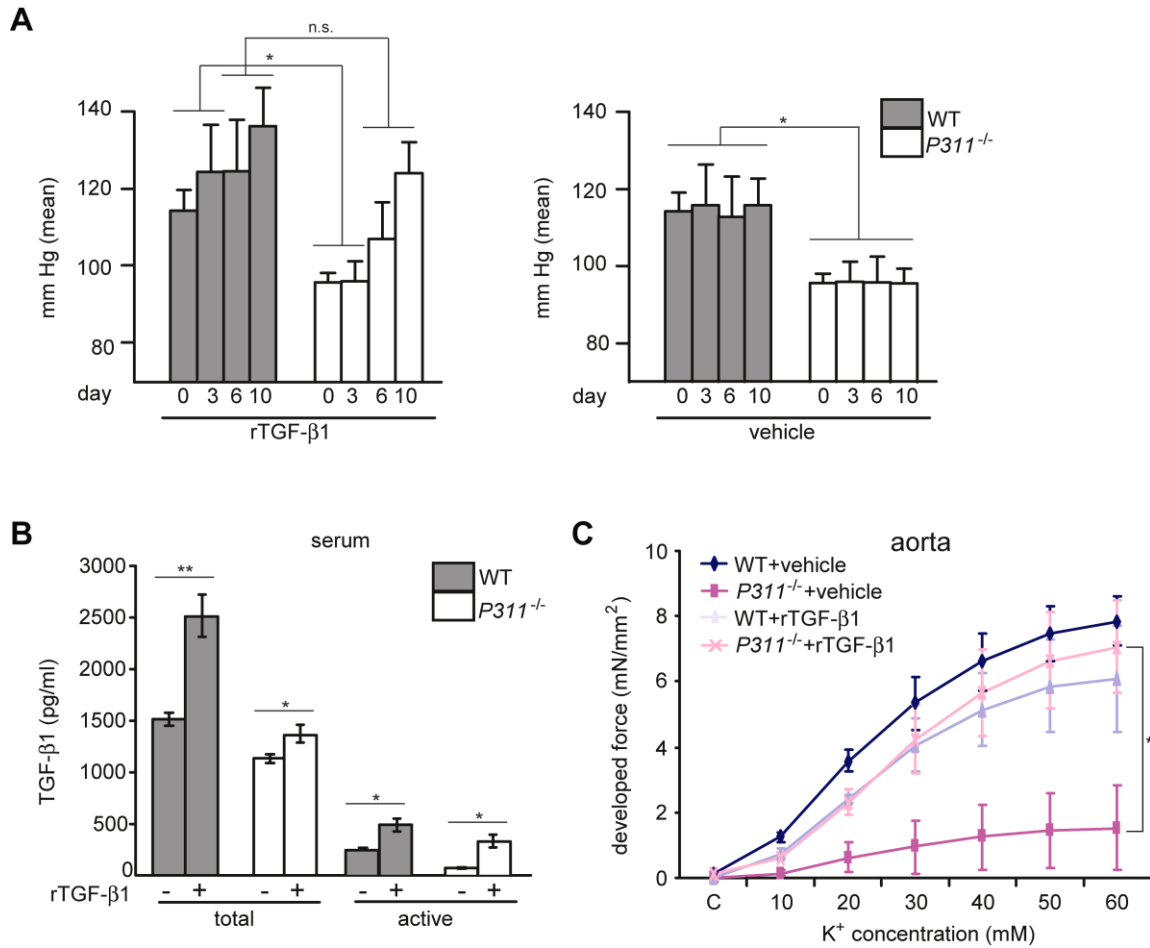

**Supplemental Figure 7** Administration of rTGF-β1 to *P311*<sup>-/-</sup> mice improves blood pressure and contractility. **(A)** Plethysmographic blood pressure determination in WT ( $n = 5$ ) and *P311*<sup>-/-</sup> ( $n = 5$ ) mice, with and without rTGF-β1 treatment. **(B)** ELISA showing total and active TGF-β1 in WT ( $n = 4$ ) and *P311*<sup>-/-</sup> ( $n = 4$ ) mice blood serum, with and without rTGF-β1 treatment. **(C)** Contractile response of aortas from WT ( $n = 5$ ) and *P311*<sup>-/-</sup> mice ( $n = 5$ ) to increasing K<sup>+</sup> concentration, with and without rTGF-β1 treatment. Data represent mean  $\pm$  s.d. \* $p < 0.05$ , \*\* $p < 0.01$ , n.s., non-significant by one-way ANOVA.

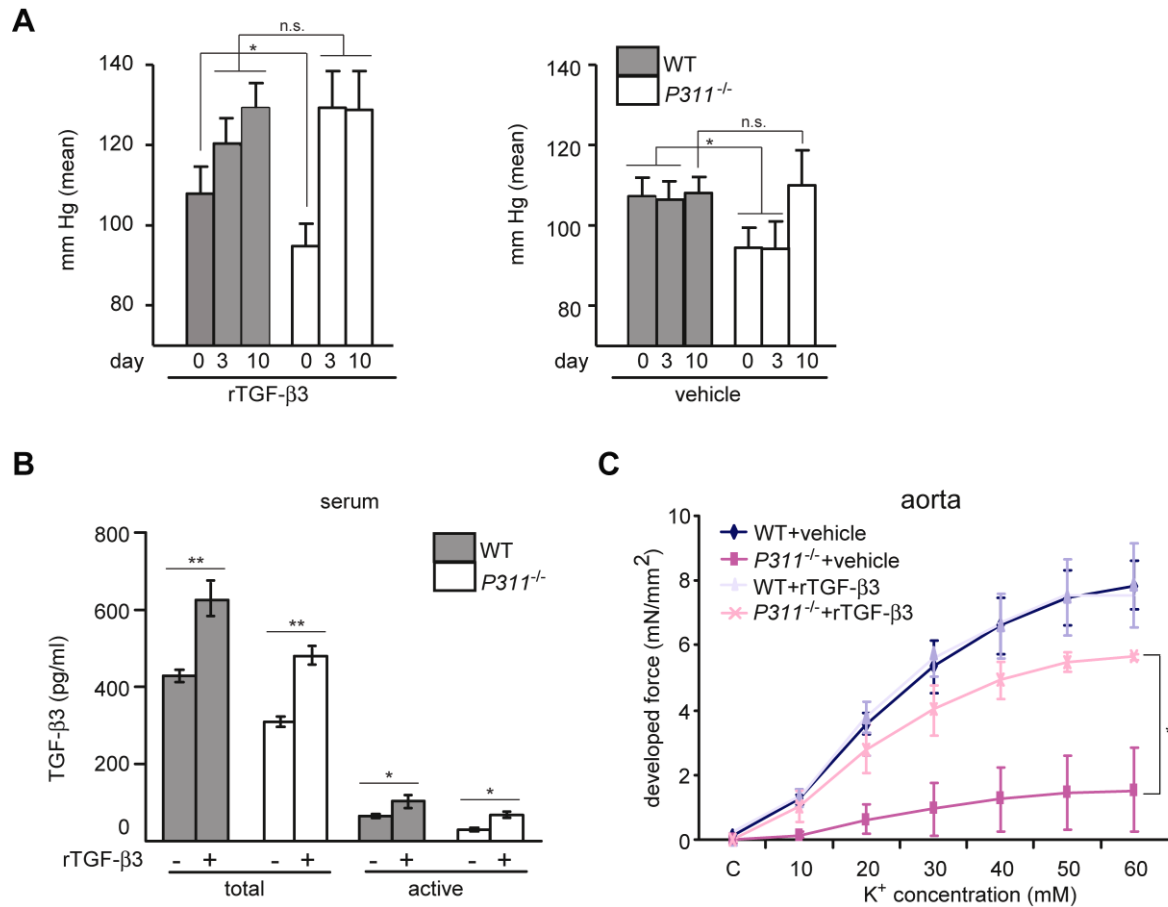

**Supplemental Figure 8** Administration of rTGF-β3 to *P311*<sup>-/-</sup> mice improves blood pressure and contractility. **(A)** Plethysmographic blood pressure determination in WT ( $n = 5$ ) and *P311*<sup>-/-</sup> ( $n = 5$ ) mice, with and without rTGF-β1 treatment. **(B)** ELISA showing total and active TGF-β3 in WT ( $n = 4$ ) and *P311*<sup>-/-</sup> ( $n = 4$ ) mice blood serum, with and without rTGF-β3 treatment. **(C)** Contractile response of aortas from WT ( $n = 5$ ) and *P311*<sup>-/-</sup> mice ( $n = 5$ ) to increasing K<sup>+</sup> concentration, with and without rTGF-β3 treatment. Data represent mean  $\pm$  s.d. \* $p < 0.05$ , \*\* $p < 0.01$ , n.s., non-significant by one-way ANOVA.



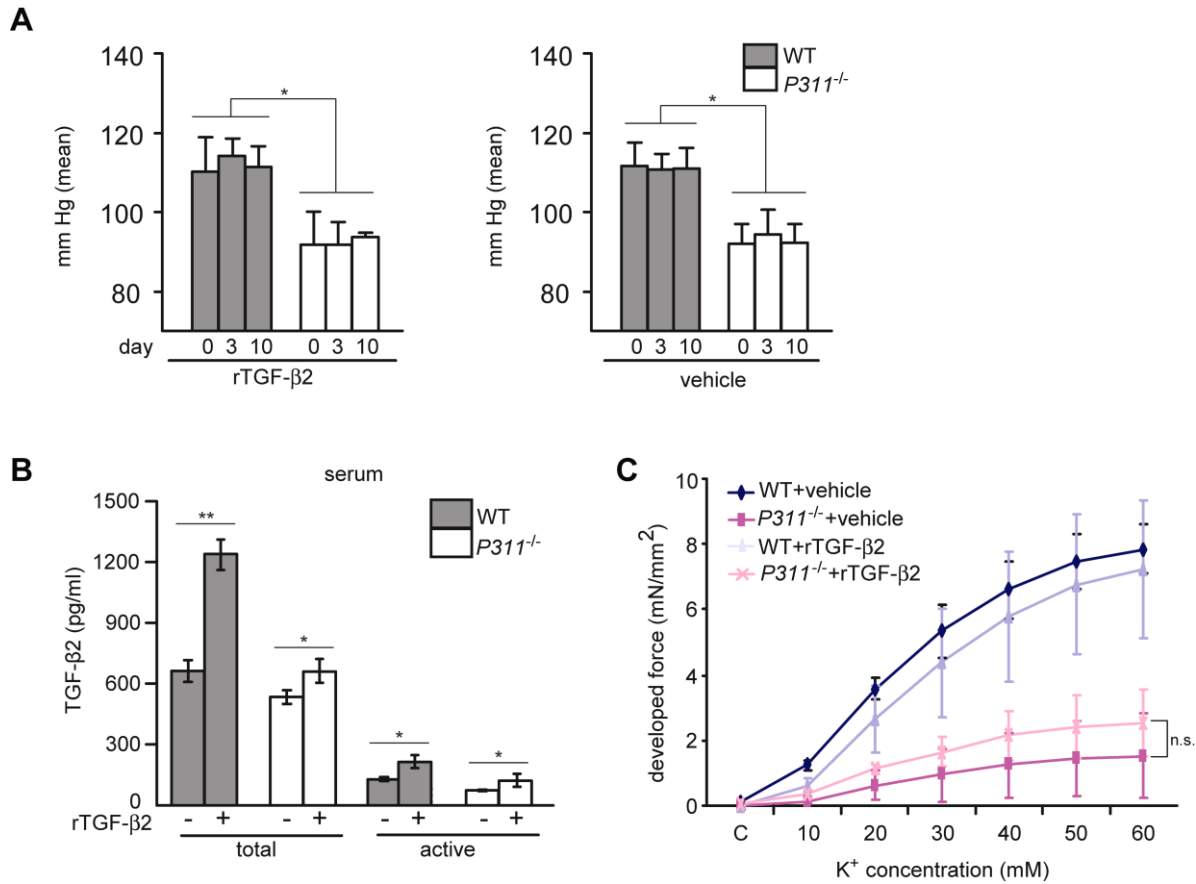

**Supplemental Figure 9** Administration of rTGF- $\beta$ 2 to  $P311^{-/-}$  mice does not improve blood pressure and contractility. (A) Plethysmographic blood pressure determination in WT ( $n = 5$ ) and  $P311^{-/-}$  ( $n = 5$ ) mice, with and without rTGF- $\beta$ 2 treatment. (B) ELISA showing total and active TGF- $\beta$ 2 in WT ( $n = 4$ ) and  $P311^{-/-}$  ( $n = 4$ ) mice blood serum, with and without rTGF- $\beta$ 2 treatment. (C) Contractile response of aortas from WT ( $n = 5$ ) and  $P311^{-/-}$  mice ( $n = 5$ ) to increasing K<sup>+</sup> concentration, with and without rTGF- $\beta$ 2 treatment. Data represent mean  $\pm$  s.d. \* $p < 0.05$ , \*\* $p < 0.01$ , n.s. non-significant by one-way ANOVA.
